# Supplementary material for: Chromosome-level genome assembly of Albizia odoratissima and effect of flavonoid metabolic pathways under drought stress
Source: Research Square preprint supplement (doi:10.21203/rs.3.rs-6840333/v1), 2025-06-17
Supplement: Supplementary file 1 [file d9ee89a62307ef7c97110e70.docx]

**Table S1. Statistic of data used for *A. odoratissima* genome assembly.**

|  | Pacbio CCS | Illumina X10 | Hi-C |
| --- | --- | --- | --- |
| Total Num. of sequencing Cell (Library) | 1 | 2 | 1 |
| Total Num. of clean reads | 4,172,726 | 461,101,202 | 561,818,577 |
| Total Num. of sequenced Base (bp) | 54,034,713,989 | 69,165,180,300 | 168,052,810,380 |
| Mean reads length (bp) | 12,460 bp | 150 bp | 150 bp |
| Coverage (X) | ~75 | ~95 | ~230 |

**Table S2. Statistics of Hi-C sequencing and mapping.**

| Statistics of mapping | | |
| --- | --- | --- |
| Mapping type | Number of reads | |
| Total read pairs | 561,818,577 | |
| Mapped reads | 955,740,892 | |
| Unique mapped read pairs | 431,315,689 | |
| Statistics of valid Hi-C data | | |
| Type | Number of reads | Ratio (%) |
| Unique paired alignments | 431,315,689 | 100 |
| Valid interaction pairs | 277,691,615 | 64.38 |
| Dangling end pairs | 115,917,404 | 26.88 |
| Re-ligation pairs | 8,556,730 | 1.98 |
| Self-cycle pairs | 2,579,985 | 0.6 |
| Dumped pairs | 26,569,955 | 6.16 |

**Table S3. Summary of chromosome level assembly based on Hi-C data.**

| Chromosome | Cluster number | Cluster length(bp) | Order number | Order length (bp) |
| --- | --- | --- | --- | --- |
| LG01 | 2 | 76,009,827 | 2 | 76,009,827 |
| LG02 | 1 | 69,437,709 | 1 | 69,437,709 |
| LG03 | 1 | 69,159,070 | 1 | 69,159,070 |
| LG04 | 1 | 65,056,417 | 1 | 65,056,417 |
| LG05 | 1 | 59,272,281 | 1 | 59,272,281 |
| LG06 | 1 | 56,477,324 | 1 | 56,477,324 |
| LG07 | 4 | 54,903,319 | 3 | 54,653,319 |
| LG08 | 1 | 53,741,868 | 1 | 53,741,868 |
| LG09 | 1 | 48,558,590 | 1 | 48,558,590 |
| LG10 | 1 | 47,129,038 | 1 | 47,129,038 |
| LG11 | 1 | 46,623,727 | 1 | 46,623,727 |
| LG12 | 3 | 37,996,707 | 2 | 37,800,000 |
| LG13 | 1 | 35,962,911 | 1 | 35,962,911 |
| Total (Ratio%) | 19 (14.84) | 720,328,788(98.64) | 17(89.47) | 719,882,081(99.94) |

**Table S4. Quality assessment of the assembled genome.**

| Statistics of Illumina clean reads mapping rate | | | | | | | | | |
| --- | --- | --- | --- | --- | --- | --- | --- | --- | --- |
| Total reads | Mapped reads | | Mapped (%) | | | Properly mapped reads | | | Properly_mapped (%) |
| 461,101,202 | 454,948,025 | | 98.67% | | | 434,527,624 | | | 94.24% |
| CEMGA assessment results | | | | | | | | | |
| Number of 458 CEGs* present in assembly | | % of 458 CEGs present in assemblies | | | Number of 248 highly conserved CEGs present | | | % of 248 highly conserved CEGs present | |
| 447 | | 97.60% | | | 233 | | | 93.95% | |
| BUSCOs assessment results | | | | | | | | | |
| Type | | | | Number | | | Percent (%) | | |
| Complete BUSCOs | | | | 1580 | | | 97.9 | | |
| Complete and single-copy BUSCOs | | | | 1538 | | | 95.3 | | |
| Complete and duplicated BUSCOs | | | | 42 | | | 2.6 | | |
| Fragmented BUSCOs | | | | 1 | | | 0.1 | | |
| Missing BUSCOs | | | | 33 | | | 2.0 | | |
| Total BUSCO groups searched | | | | 1614 | | | 100 | | |

**Table S5. Predicted results of *Albizia odoratissima* genes.**

| Coding gene prediction statistics | | | |
| --- | --- | --- | --- |
| Method | Software | Species | Gene number |
| Ab initio | Augustus | - | 28,961 |
|  | SNAP | - | 63,227 |
| Homology-based | GeMoMa | A. duranensis | 27,443 |
|  |  | A. thaliana | 25,658 |
|  |  | E. grandis | 26,573 |
|  |  | G. max | 31,503 |
|  |  | M. truncatula | 21,181 |
|  |  | P. trichocarpa | 28,841 |
|  |  | S. tora | 32,929 |
| RNAseq | GeneMarkS-T | - | 18,951 |
|  | PASA | - | 19,504 |
| Integration | EVM | - | 31,457 |
| Noncoding RNA Statistics | | | |
| rRNA |  |  | 2027 |
| tRNA |  |  | 598 |
| miRNA |  |  | 140 |
| snRNA |  |  | 83 |
| snoRNA |  |  | 90 |
| Pseudogene prediction results | | | |
| Total number |  |  | 190 |
| Total Length |  |  | 697,366 |
| Average length |  |  | 3670.35 |

**Table S6. Gene prediction statistics.**

| Species | Number of genes | Gene’s length (avg.) | CDS length (avg.) | Exon length (avg.) | Intron length (avg.) | Exons per gene (avg.) |
| --- | --- | --- | --- | --- | --- | --- |
| *M. truncatula* | 50,444 | 2621.04 | 988.16 | 1262.26 | 1358.78 | 3.06 |
| *G. max* | 56,044 | 3854.89 | 1168.07 | 1168.07 | 2686.82 | 4.05 |
| *A. duranensis* | 36,450 | 3362.9 | 1098.4 | 1418.94 | 1943.96 | 4.81 |
| *P. trichocarpa* | 42,949 | 3170.93 | 1108.52 | 1598.53 | 1572.4 | 3.86 |
| *S. tora* | 45,268 | 3157.23 | 951.21 | 951.21 | 2206.02 | 3.37 |
| *A. thaliana* | 27,336 | 2204.44 | 1219.2 | 1481.4 | 723.04 | 4.31 |
| *E. grandis* | 36,348 | 3104.89 | 1162.97 | 1162.97 | 1941.92 | 3.6 |
| *A. odoratissima* | 31,457 | 4124.27 | 1267.99 | 1556.45 | 2567.82 | 4.43 |

**Table S7. Gene BUSCO assessment results form.**

| Complete BUSCOs(C) | Complete and  single-copy BUSCOs(S) | Complete and duplicated BUSCOs(D) | Fragmented BUSCOs(F) | Missing BUSCOs(M) | Total Lineage BUSCOs |
| --- | --- | --- | --- | --- | --- |
| 1565 (96.96%) | 1517 (93.99%) | 48 (2.97%) | 11 (0.68%) | 38 (2.35%) | 1,614 |

**Table S8. Functional annotation of predicted protein-coding genes in the *A. odoratissima* genome.**

| **Database** | **Numbers of matching genes** | **Percent of annotated genes (%)** |
| --- | --- | --- |
| GO | 24,833 | 78.94 |
| KEGG | 22,753 | 72.33 |
| KOG | 16,138 | 51.3 |
| Pfam | 25,862 | 82.21 |
| Swissprot | 24,158 | 76.8 |
| TrEMBL | 29,703 | 94.42 |
| eggNOG | 25,709 | 81.73 |
| nr | 29,871 | 94.96 |
| All | 29,930 | 95.15 |

**Table S9. Classification of repetitive elements in thegenome.**

| **Repeat type** | **Number of elements** | **Length（bp）** | **Percentage in Genome (%)** |
| --- | --- | --- | --- |
| **Class I: Retroelement** | **457,778** | **320,982,386** | **43.95** |
| DIRS | 753 | 65,926 | 0.01 |
| **non-LTR Retrotransposon** | 75,361 | 19,512,618 | 2.67 |
| SINE | 6,829 | 1,022,460 | 0.14 |
| LINE | 68,532 | 18,490,158 | 2.53 |
| **LTR Retrotransposon** | 381,664 | 301,403,842 | 41.29 |
| **LTR/Copia** | **88,817** | **87,042,790** | **11.92** |
| **LTR/Gypsy** | **124,369** | **122,654,749** | **16.8** |
| LTR/ERV | 16,134 | 2,739,439 | 0.38 |
| LTR/Pao | 1,221 | 110,655 | 0.02 |
| LTR/Viper | 47 | 4,993 | 0 |
| LTR/Cassandra | 442 | 150,025 | 0.02 |
| LTR/Caulimovirus | 3,077 | 3,004,622 | 0.41 |
| LTR/Unknown | 147,557 | 85,696,569 | 11.74 |
| **Class II: DNA transposon** | **308,810** | **90,771,783** | **12.43** |
| Academ | 39 | 2,544 | 0 |
| CACTA | 43,533 | 29,504,222 | 4.04 |
| Crypton | 1,133 | 71,958 | 0.01 |
| Dada | 536 | 69,573 | 0.01 |
| EnSpm | 1 | 173 | 0 |
| Ginger | 985 | 109,039 | 0.01 |
| Helitron | 5,515 | 2,370,581 | 0.32 |
| IS3EU | 646 | 128,053 | 0.02 |
| Kolobok | 984 | 77,086 | 0.01 |
| MITE | 39 | 2,165 | 0 |
| Maverick | 713 | 42,490 | 0.01 |
| Merlin | 655 | 102,769 | 0.01 |
| Mutator | 8,061 | 2,200,712 | 0.3 |
| Novosib | 753 | 45,195 | 0.01 |
| P | 570 | 32,195 | 0 |
| PIF-Harbinger | 10,628 | 3,851,817 | 0.53 |
| PiggyBac | 817 | 45,783 | 0.01 |
| Sola | 500 | 35,038 | 0 |
| Tc1-Mariner | 5,231 | 368,352 | 0.05 |
| Unknown | 190,305 | 42,628,651 | 5.84 |
| Zator | 66 | 3,741 | 0 |
| Zisupton | 792 | 46,899 | 0.01 |
| hAT | 36,308 | 9,032,747 | 1.24 |
| **Total** | **766,588** | **411,754,169** | **56.38** |

**Table S10. Predicted tandem repeats in the genome of *Albizia. odoratissima.***

| Type | Number | Length | Rate (%) |
| --- | --- | --- | --- |
| Microsatellite (1-9 bp units) | 346,654 | 6,200,420 | 0.85 |
| Minisatellite (10-99 bp units) | 137,379 | 10,368,220 | 1.42 |
| Satellite (>=100 bp units) | 15,614 | 7,001,096 | 0.96 |
| Total | 499,647 | 23,569,736 | 3.23 |

**Table.S11 Statistical Information on Gene Family Clustering**

| Item | Number of genes | Number of genes in orthogroups | Number of unassigned genes | Percentage of genes in orthogroups | Percentage of unassigned genes | Number of orthogroups containing species | Percentage of orthogroups containing species | Number of species-specific orthogroups | Number of genes in species-specific orthogroups | Percentage of genes in species-specific orthogroups |
| --- | --- | --- | --- | --- | --- | --- | --- | --- | --- | --- |
| *A. odoratissima* | 31 457 | 28 111 | 3 346 | 89.40 | 10.60 | 17 031 | 31.20 | 469 | 2 118 | 6.70 |
| *A. thaliana* | 27 336 | 18 583 | 8 753 | 68 | 32 | 12 874 | 23.60 | 2 350 | 6 349 | 23.20 |
| *C. arietinum* | 24 640 | 23 849 | 791 | 96.80 | 3.20 | 16 504 | 30.20 | 140 | 581 | 2.40 |
| *C. cajan* | 29 010 | 27 717 | 1 293 | 95.50 | 4.50 | 17 624 | 32.30 | 206 | 973 | 3.40 |
| *E. ulmoides* | 26 719 | 21 535 | 5 184 | 80.60 | 19.40 | 15 889 | 29.10 | 705 | 2 013 | 7.50 |
| *G. max* | 52 852 | 45 445 | 7 407 | 86 | 14 | 19 324 | 35.40 | 372 | 1 052 | 2 |
| *J. regia* | 37 259 | 35 417 | 1 842 | 95.10 | 4.90 | 17 090 | 31.3 | 591 | 2 808 | 7.50 |
| *L. corniculatus* | 64 428 | 41 431 | 22 997 | 64.30 | 35.70 | 19 725 | 36.10 | 4 536 | 15 647 | 24.30 |
| *M. sativa* | 49 120 | 41 765 | 7 355 | 85 | 15 | 17 836 | 32.60 | 1 456 | 10 878 | 22.10 |
| *N. attenuata* | 34 037 | 30 513 | 3 524 | 89.60 | 10.40 | 16 831 | 30.80 | 1 622 | 7 220 | 21.20 |
| *O. europaea* | 39 875 | 35 849 | 4 026 | 89.90 | 10.10 | 18 047 | 33 | 745 | 3 575 | 9 |
| *O. sativa* | 28 466 | 19 551 | 8 915 | 68.70 | 31.30 | 12 601 | 23.10 | 3 304 | 8 683 | 30.50 |
| *P. trichocarpa* | 31 445 | 30 216 | 1 229 | 96.10 | 3.90 | 16 792 | 30.70 | 401 | 1 689 | 5.40 |
| *P. vulgaris* | 27 433 | 26 014 | 1 419 | 94.80 | 5.20 | 17 369 | 31.80 | 144 | 573 | 2.10 |
| *T. pratense* | 63 850 | 47 565 | 16 285 | 74.50 | 25.50 | 24 027 | 44 | 3 636 | 11 108 | 17.40 |
| *V. vinifera* | 25 502 | 24 094 | 1 408 | 94.50 | 5.50 | 16 791 | 30.70 | 373 | 1 671 | 6.60 |

**Table S12. Analysis of transcriptome sequencing data for *A. odoratissima***

| Sample Name | Clean Reads | Clean Base | Read Length | Q20 (%) | GC (%) |
| --- | --- | --- | --- | --- | --- |
| CK10-1 | 24 055 786 | 7 216 735 800 | PE150 | 97.26 | 45.20 |
| CK10-2 | 24 077 064 | 7 223 119 200 | PE150 | 97.61 | 46.18 |
| CK10-3 | 24 098 876 | 7 229 662 800 | PE150 | 97.35 | 46.00 |
| DS10-1 | 24 071 925 | 7 221 577 500 | PE150 | 97.39 | 45.18 |
| DS10-2 | 24 098 248 | 7 229 474 400 | PE150 | 97.42 | 47.76 |
| DS10-3 | 24 111 255 | 7 233 376 500 | PE150 | 97.42 | 44.48 |
| CK20-1 | 24 074 902 | 7 222 470 600 | PE150 | 97.14 | 50.77 |
| CK20-2 | 24 024 057 | 7 207 217 100 | PE150 | 96.66 | 45.24 |
| CK20-3 | 24 093 446 | 7 228 033 800 | PE150 | 97.21 | 46.48 |
| DS20-1 | 24 026 334 | 7 207 900 200 | PE150 | 98.02 | 54.08 |
| DS20-2 | 24 027 948 | 7 208 384 400 | PE150 | 97.86 | 55.29 |
| DS20-3 | 24 119 054 | 7 235 716 200 | PE150 | 97.87 | 54.98 |
