# Supplementary material for: Chromosome-level genome assembly of Albizia odoratissima and effect of flavonoid metabolic pathways under drought stress
Source: Research Square preprint supplement (doi:10.21203/rs.3.rs-6840333/v1), 2025-06-17
Supplement: Supplementary file 2 [file e5e379475b36ded8482570a6.docx]

**Fig. S1. The K-mer distribution of ~25X Illumina paired-end reads using GenomeScope based on k value of 21. K-mer occurrences (x axis) were plotted against their frequencies (y axis).**

**
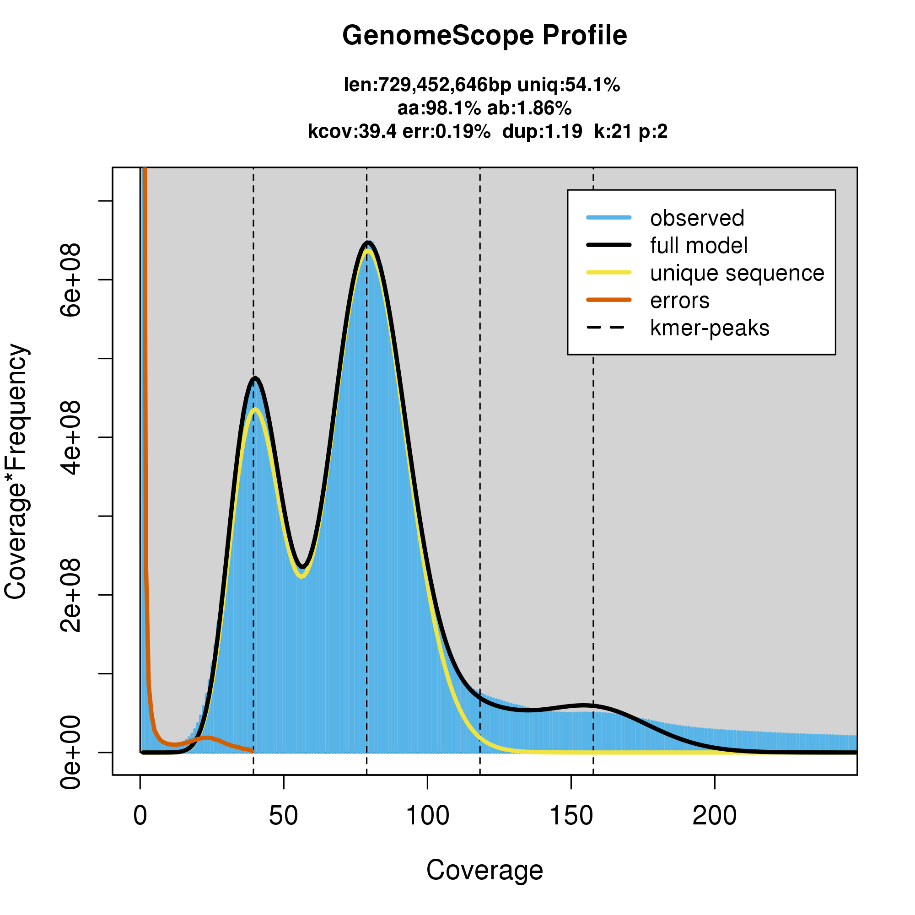
**

**Fig. S2 The Hi-C interaction heatmap plot of each *A. odoratissima* chromosome.**

**
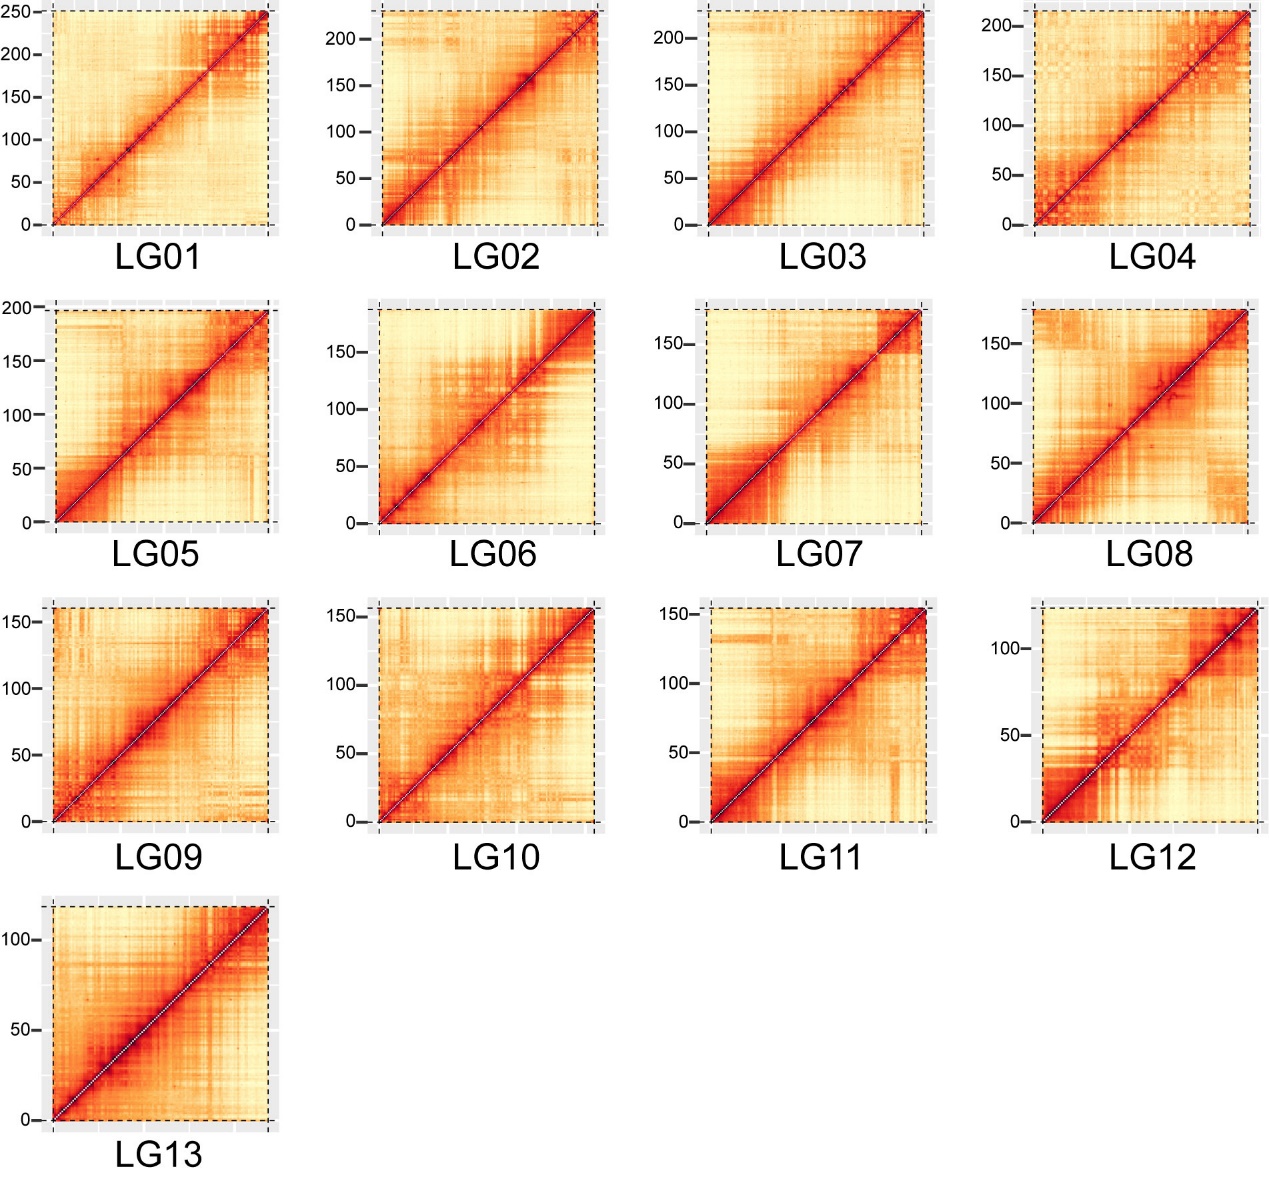
**

**Fig. S3 Number of gene function annotations in different databases of *A. odoratissima.***

**
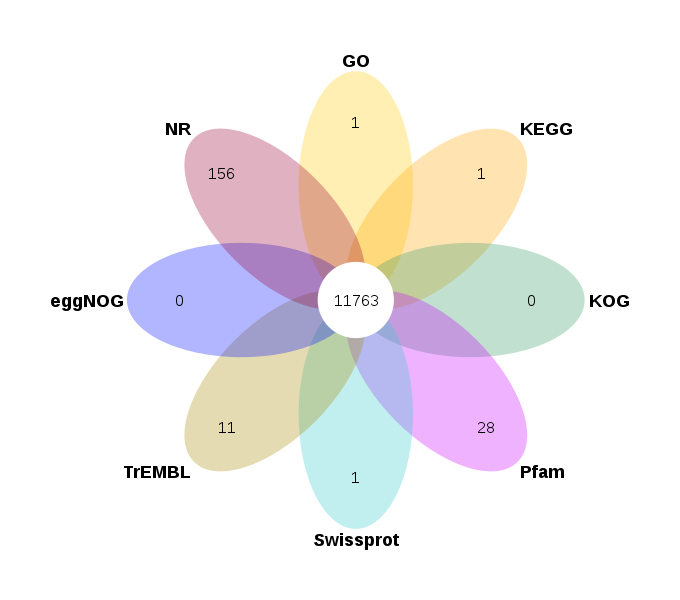
**

**Fig. S4 Classification of intact LTR-RTs in the *A. odoratissima* genome**

**
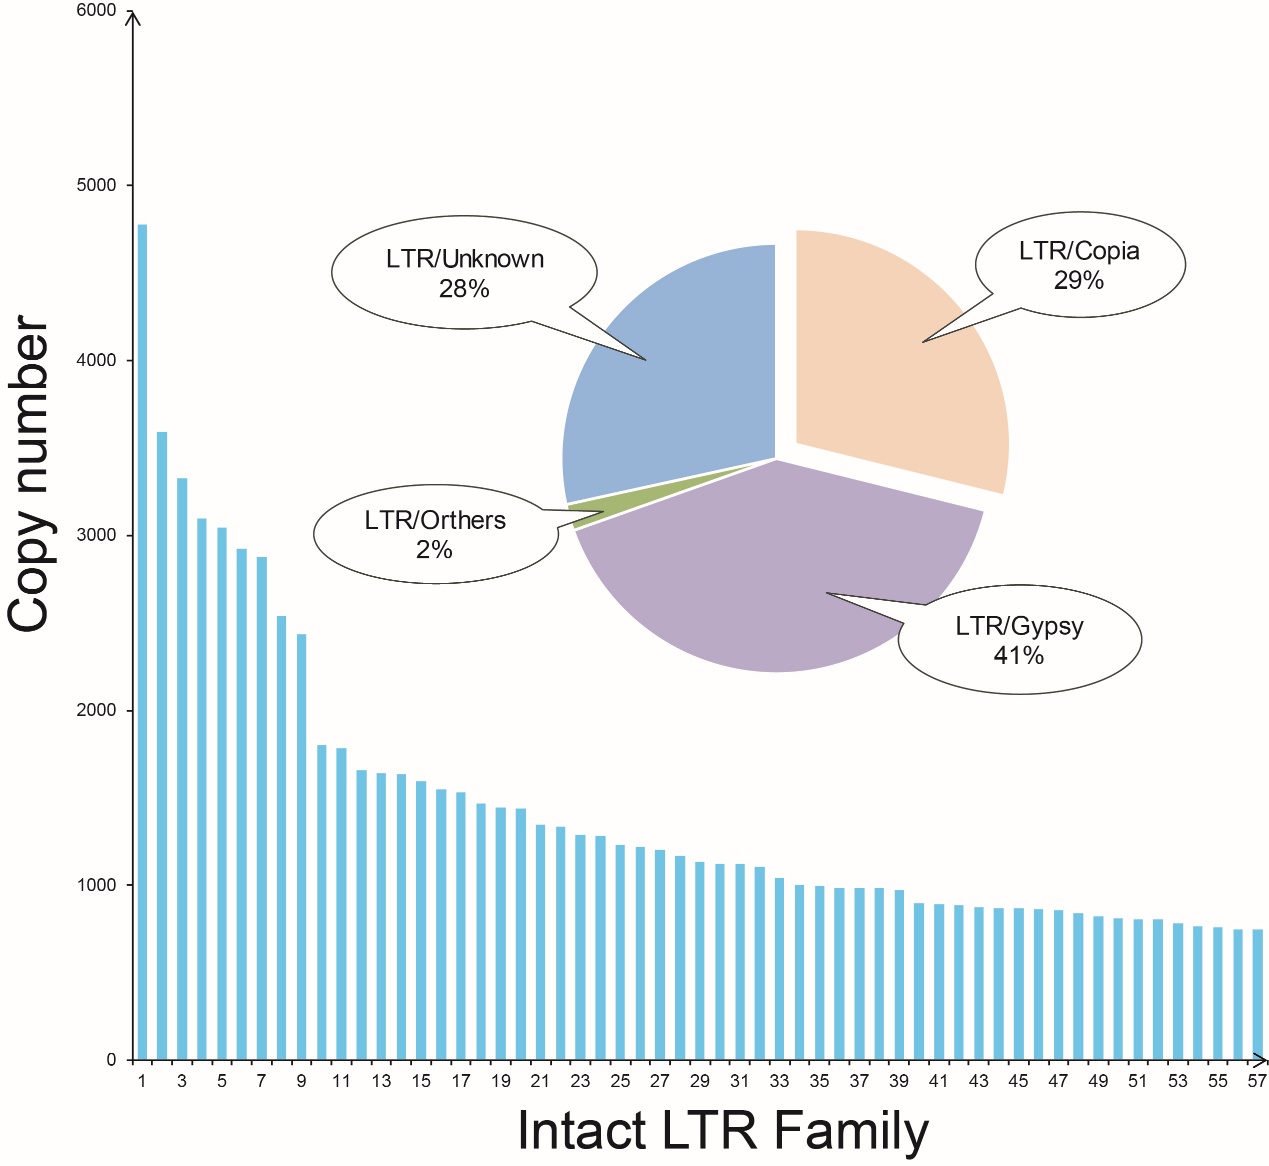
**

**Fig. S5 Petal diagrams of gene family clustering**

**
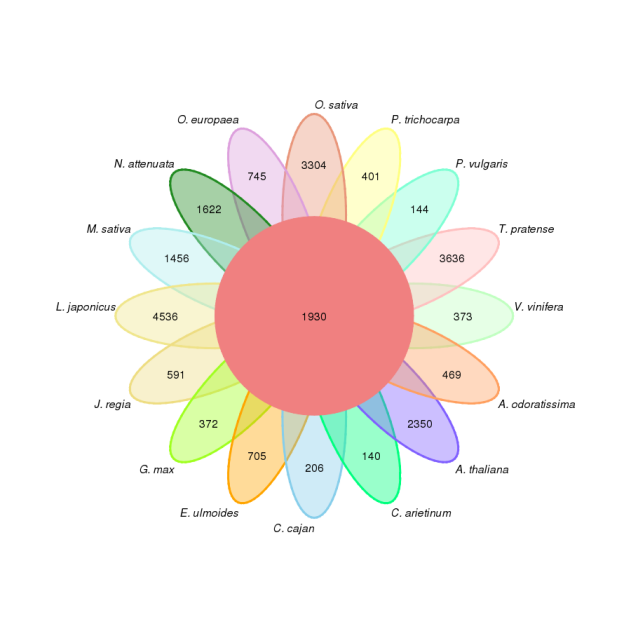
**

**Fig. S6 KEGG term enrichment of *A. odoratissima* -specific gene families.**

**
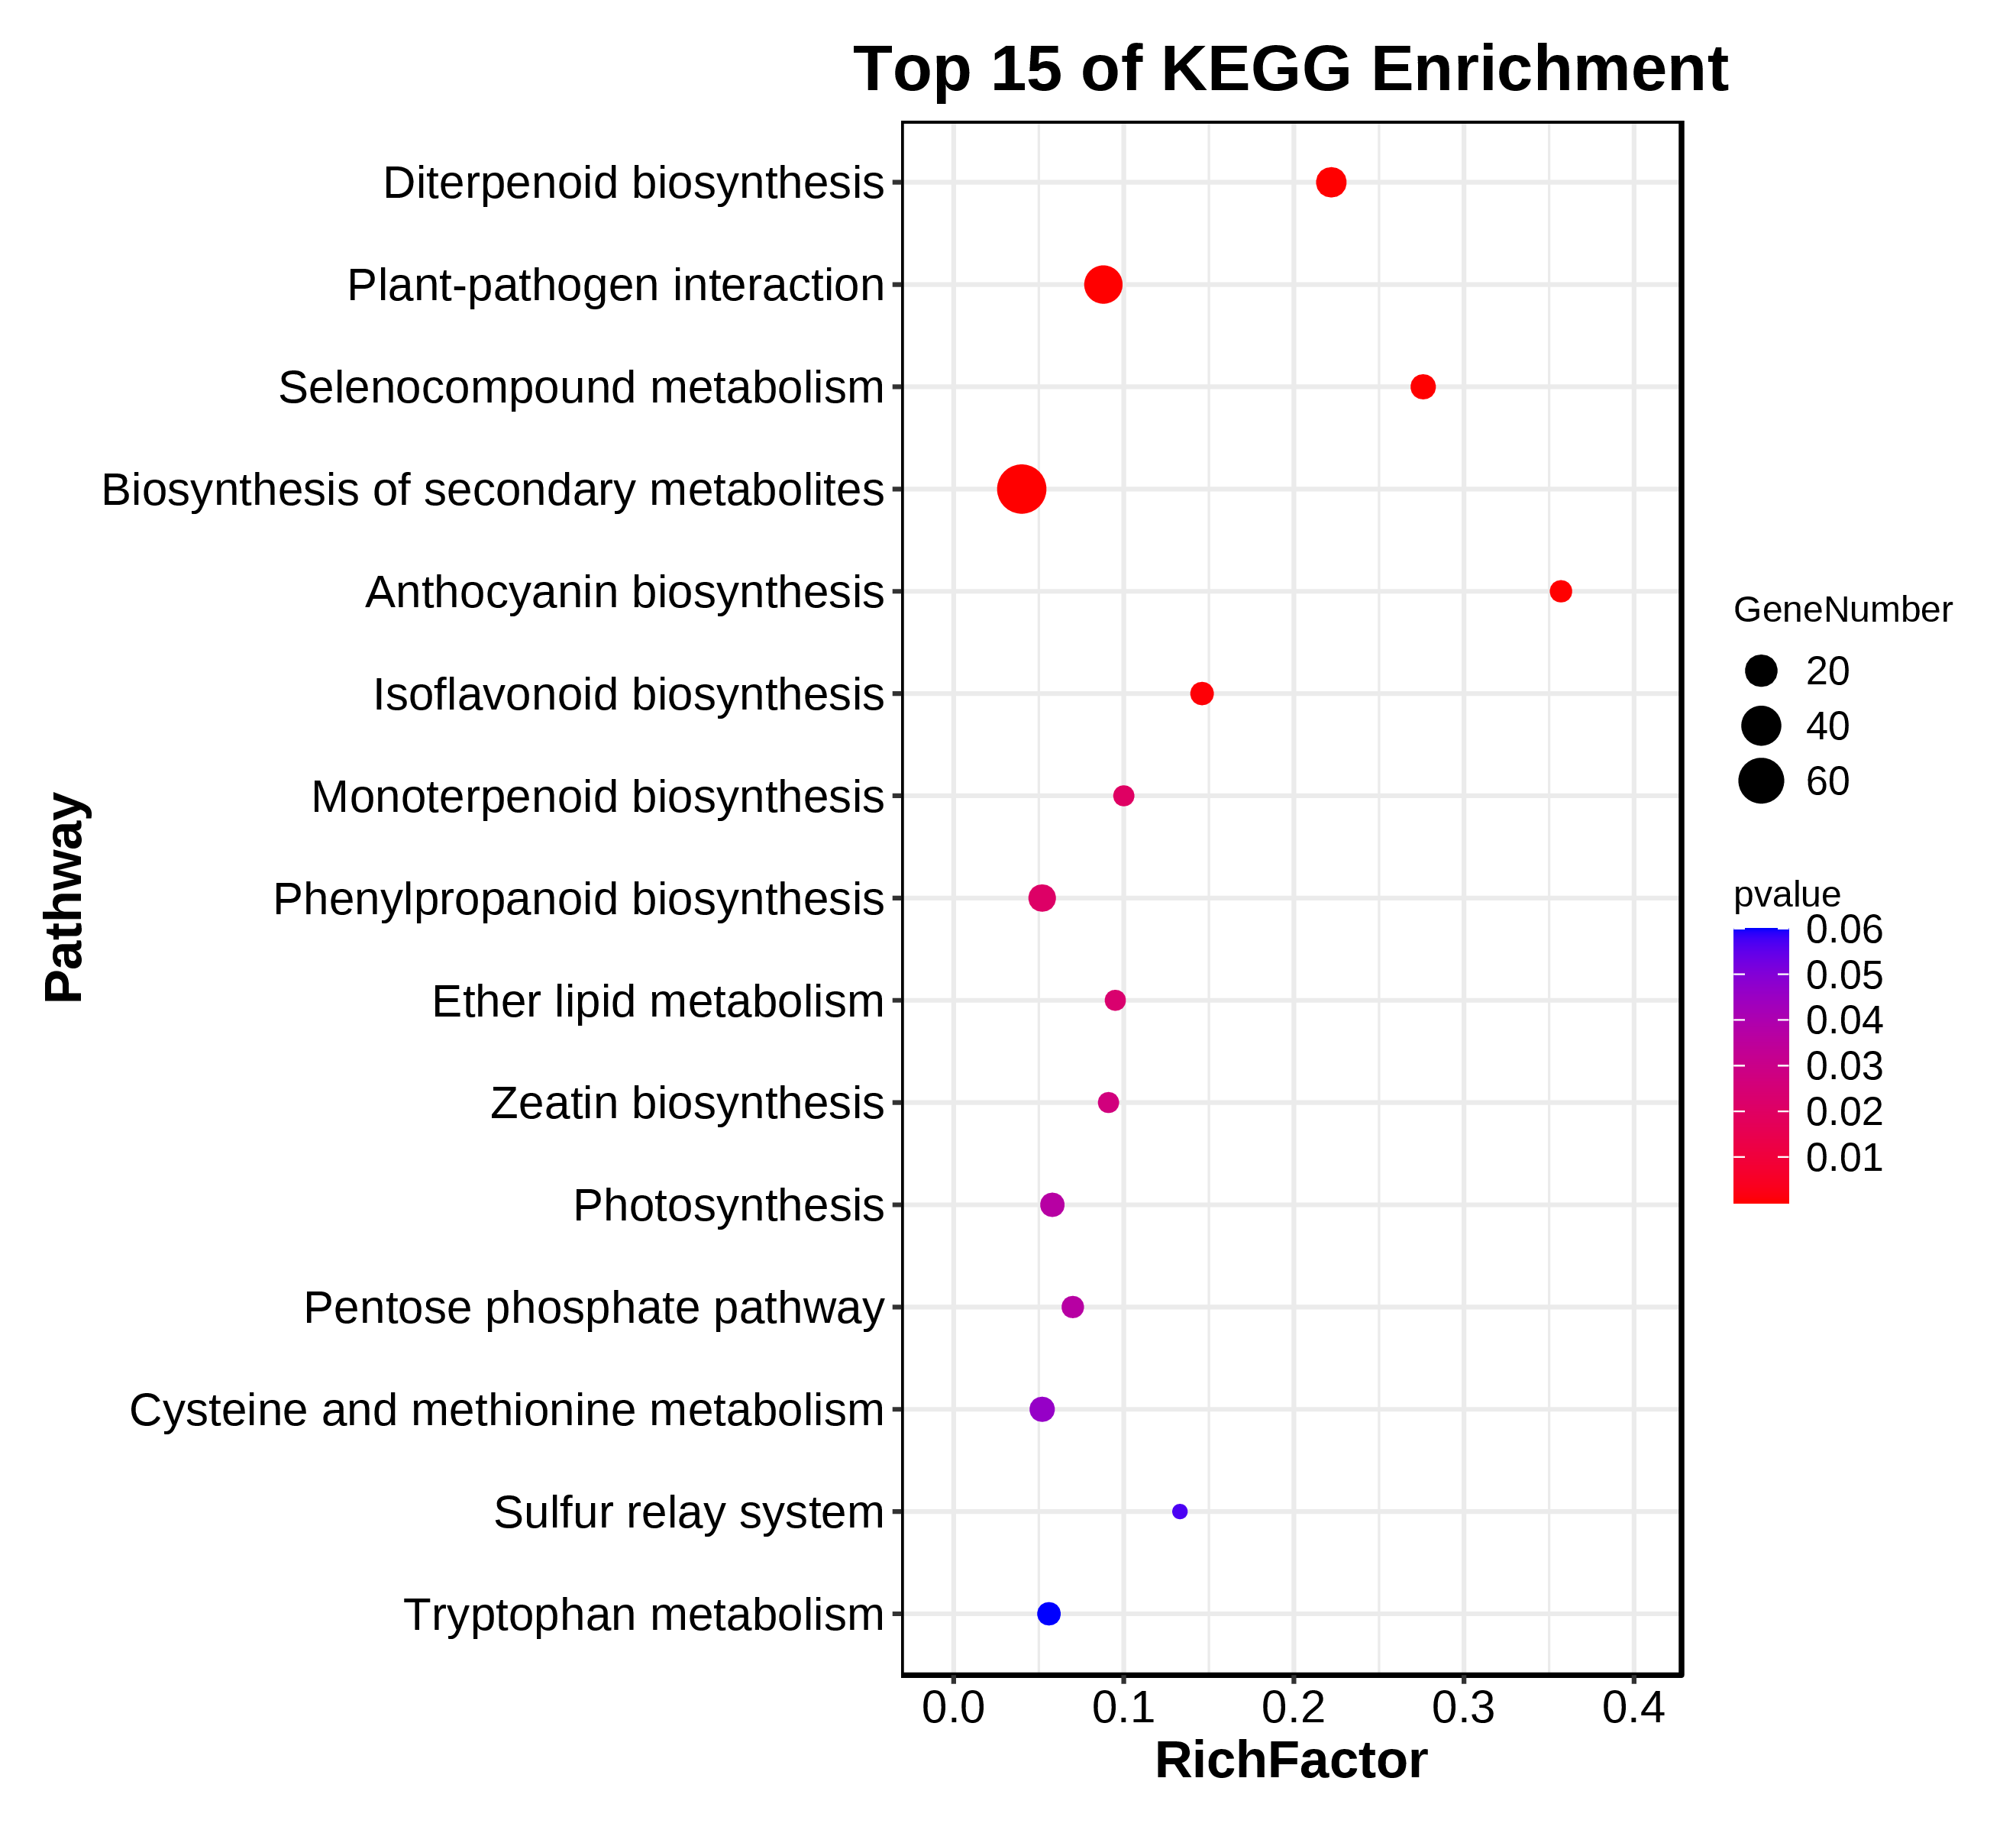
**

**
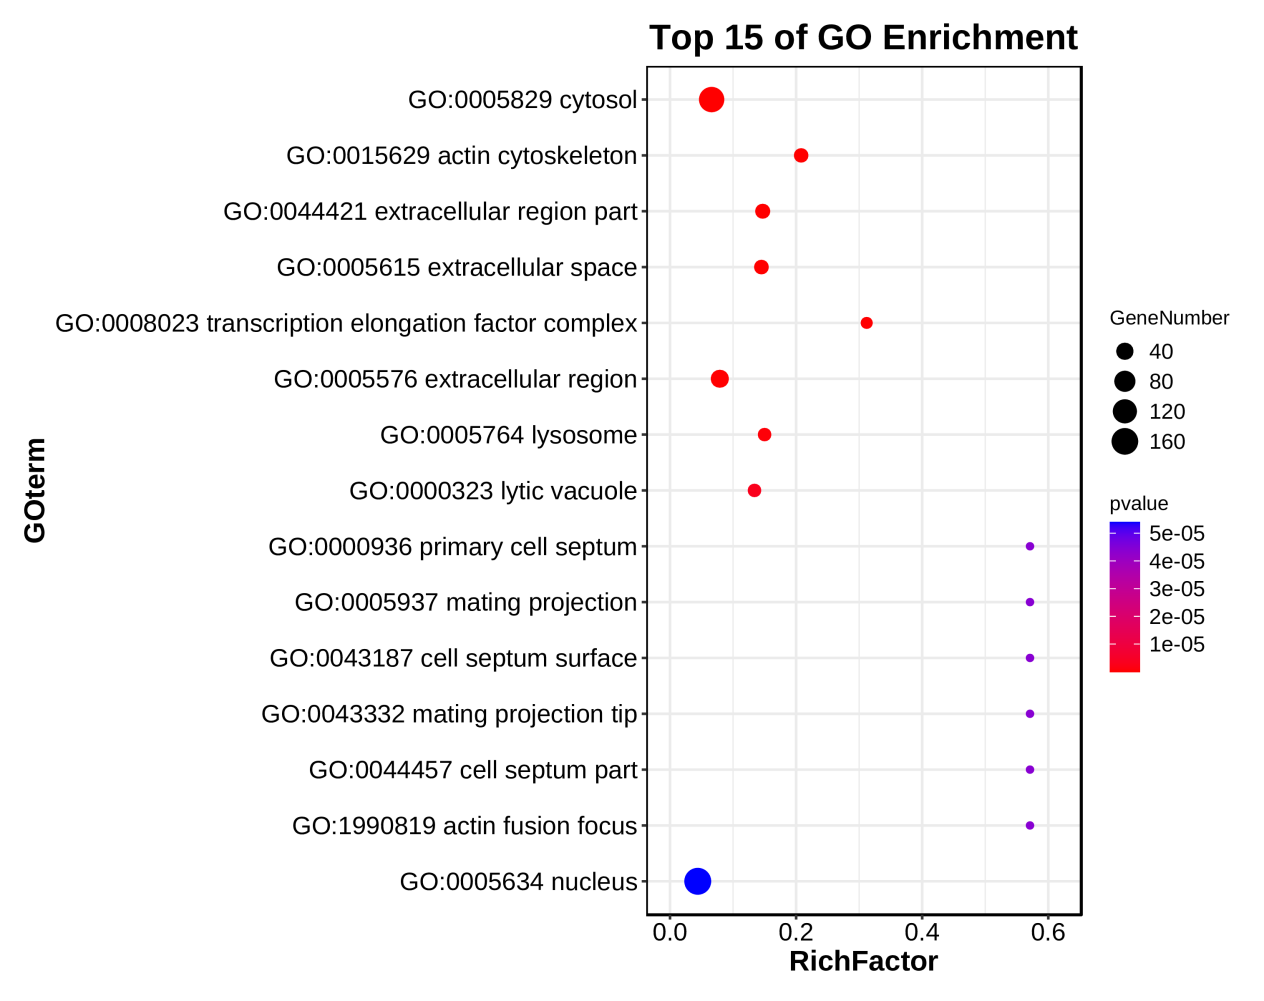
Fig. S7 GO term enrichment of *A. odoratissima* -specific gene families.**

**Fig. S8 KEGG term enrichment of *A. odoratissima* expansion gene families.**

**
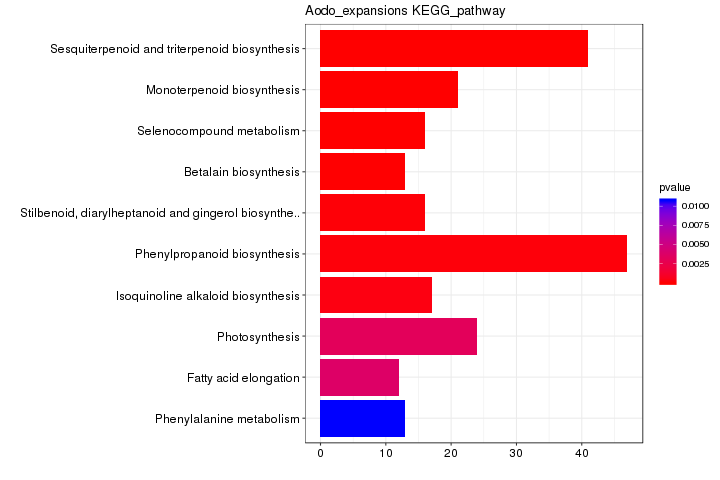
**

**Fig. S9 GO term enrichment of *A. odoratissima* expansion gene families.**

**
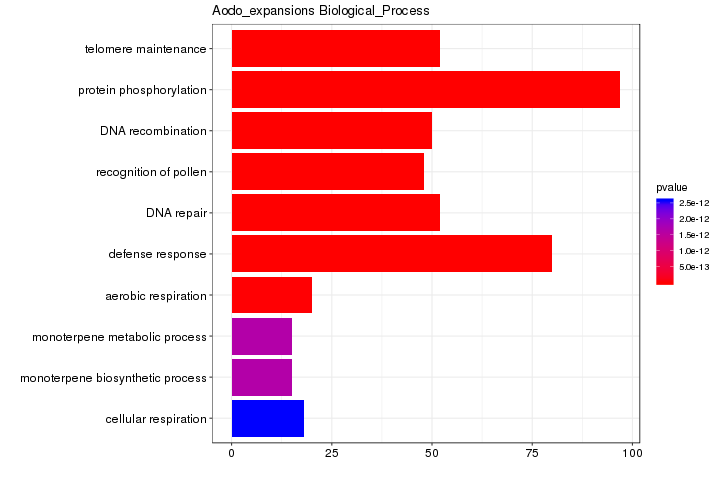
**

**Fig. S10 Transcriptome analysis. A, Principal component analysis (PCA); B, Sample correlation analysis.**

**
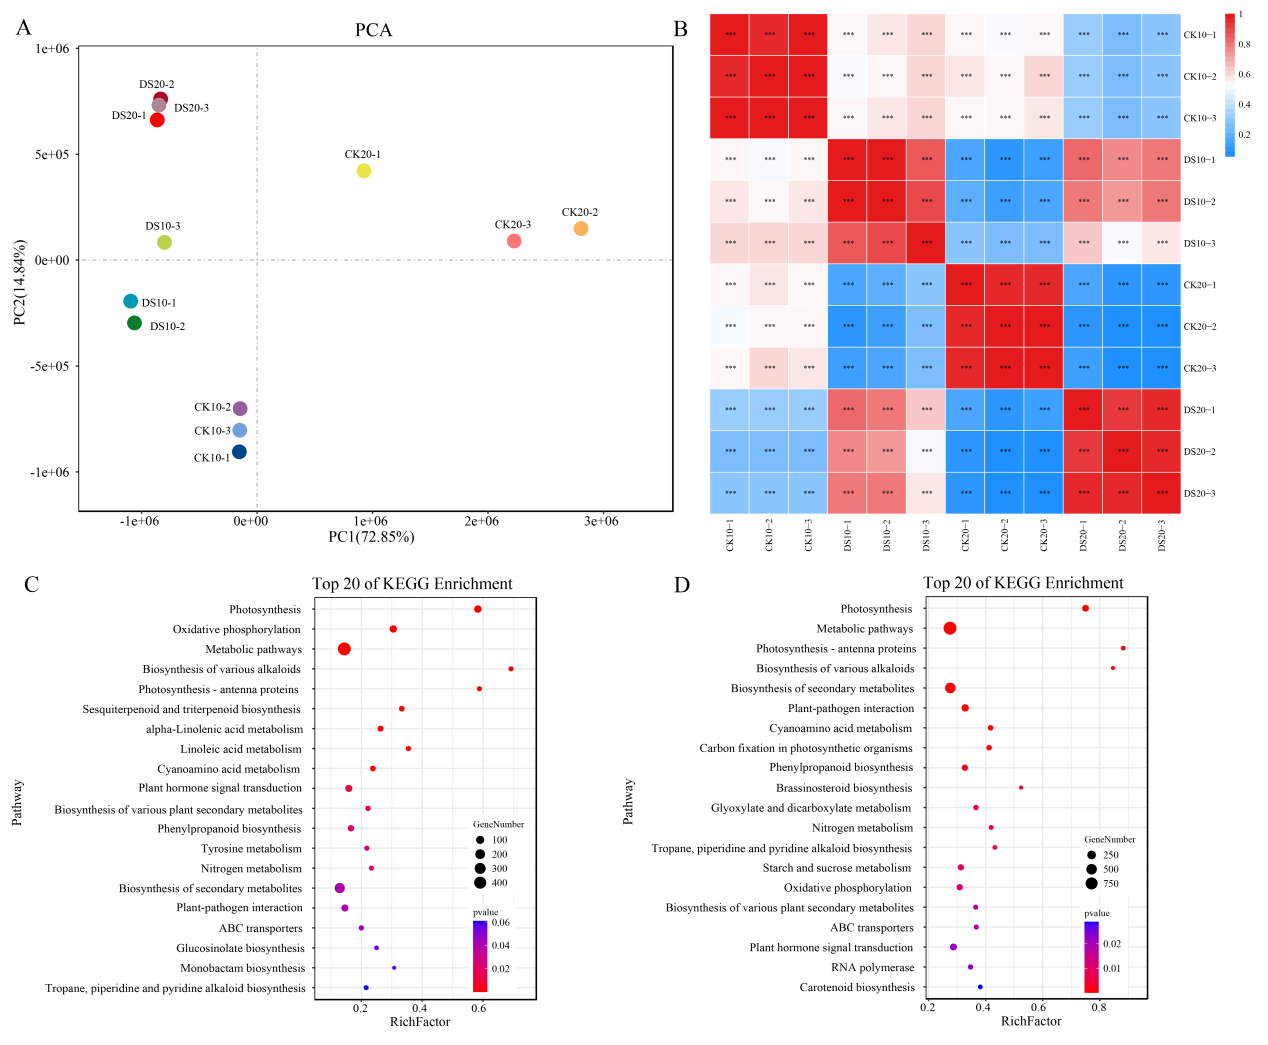
**

**Fig. S11 Metabolome analysis. A: Principal component analysis (PCA) analysis; B: Permutation test; C: Classification of metabolites in leaves of *A. odoratissima* under drought stress.**

**
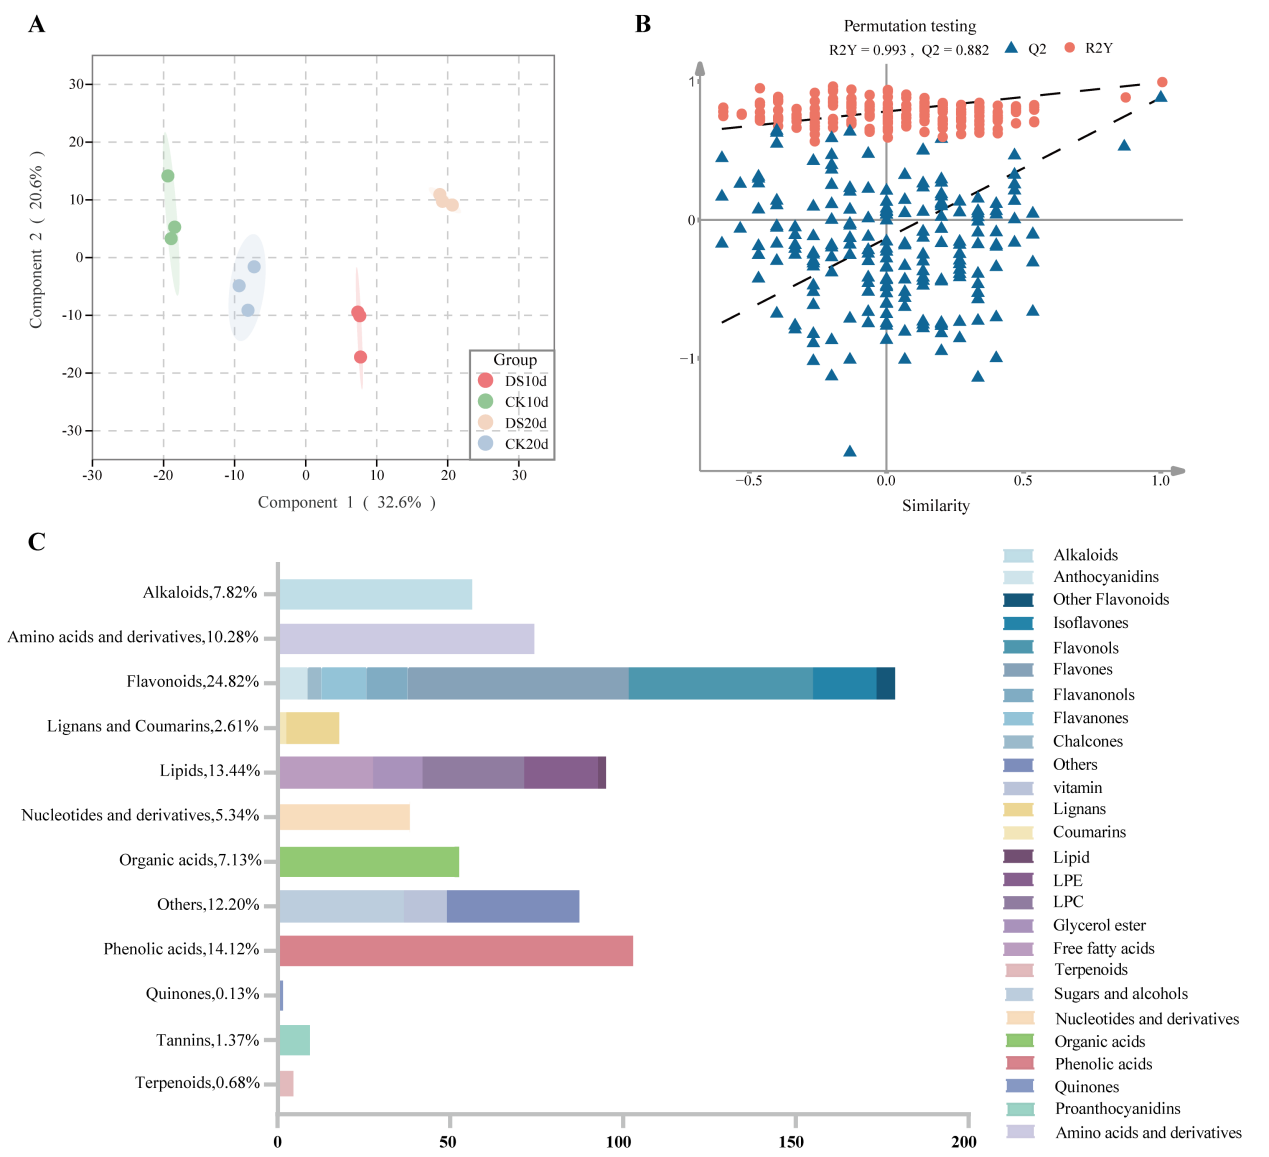
**
